# Supplementary material
Source: PubMed Central journal article supplement (PMC3281730)
Supplement: supp_M111.309369_jbc.M111.309369-1.pdf [file supp_M111.309369_jbc.M111.309369-1.pdf]

## SI Figure S1.

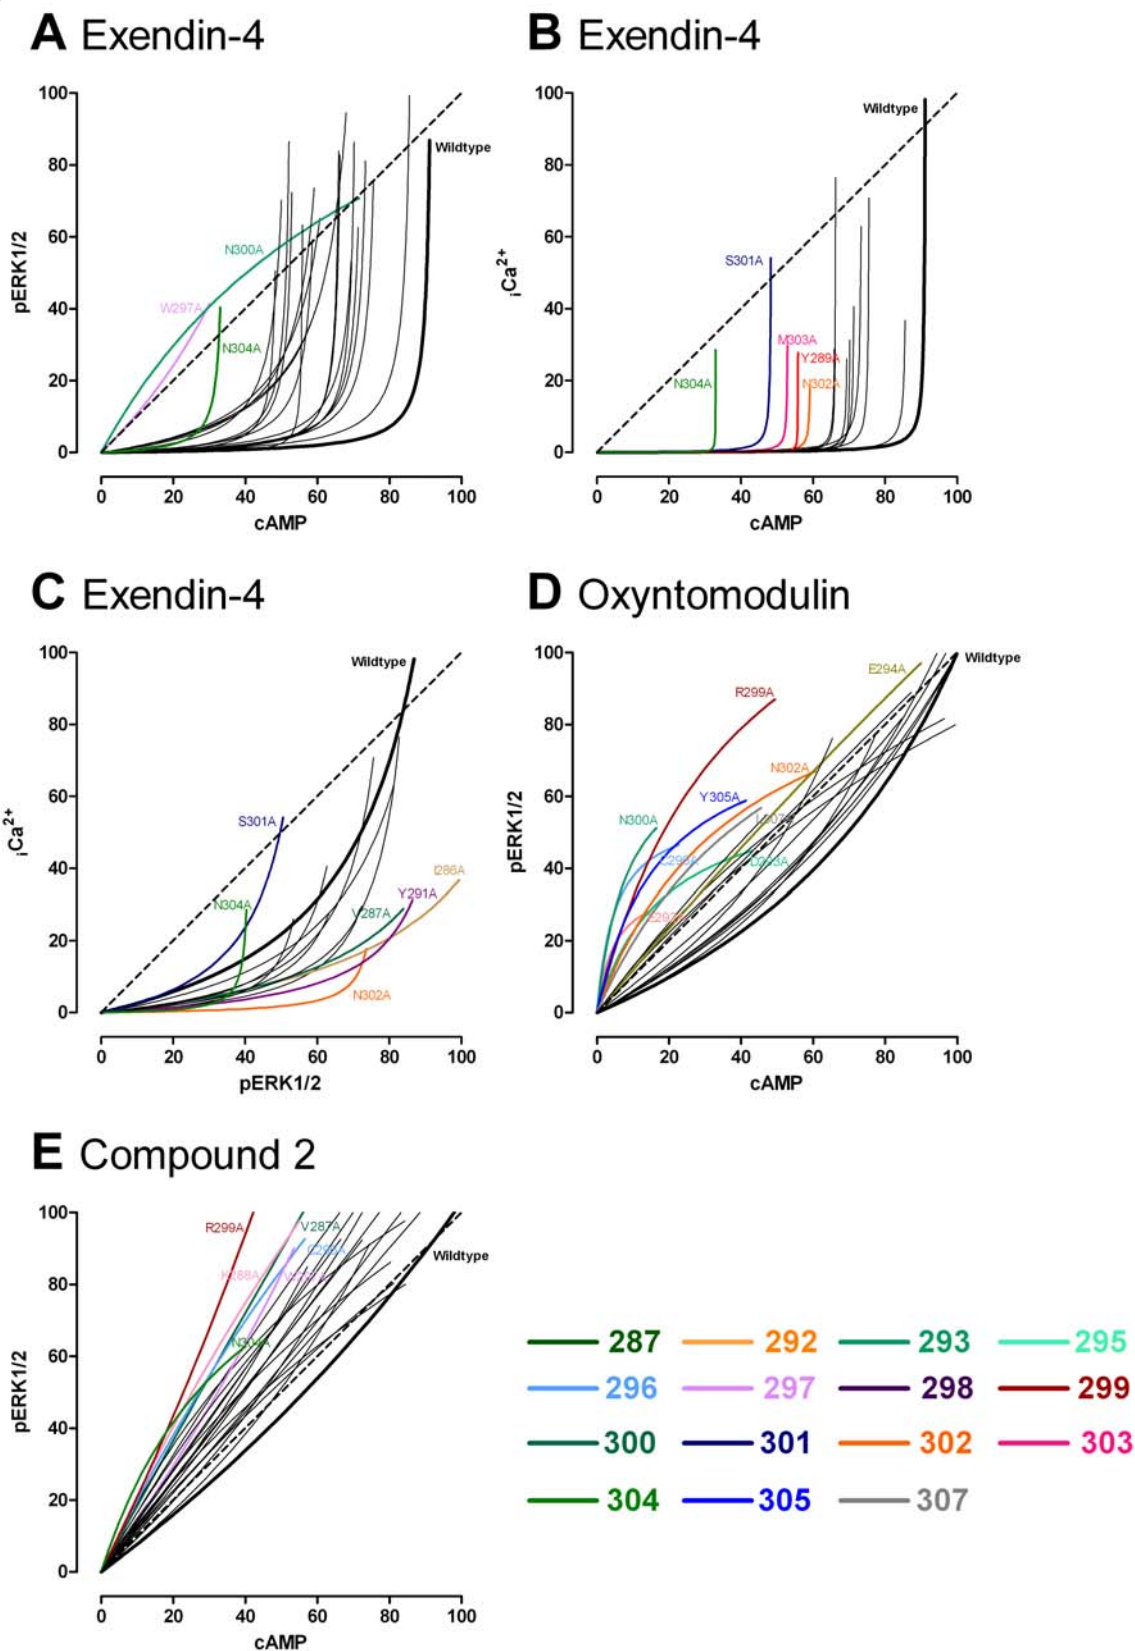

**Supplementary Figure S1. Bias plots of human GLP-1R ECL2 alanine mutants.** (A) cAMP v pERK1/2 for Exendin-4, (B) cAMP v  $iCa^{2+}$  for Exendin-4, (C) pERK1/2 v  $iCa^{2+}$  for Exendin-4, (D) cAMP v pERK1/2 for Oxyntomodulin and (E) cAMP v pERK1/2 for Compound 2. Data for each pathway are normalized to the maximal response elicited by peptide at the wildtype human GLP-1R, and analyzed with a three-parameter logistic equation as defined in equation 1, with at least 140 points defining the curve.

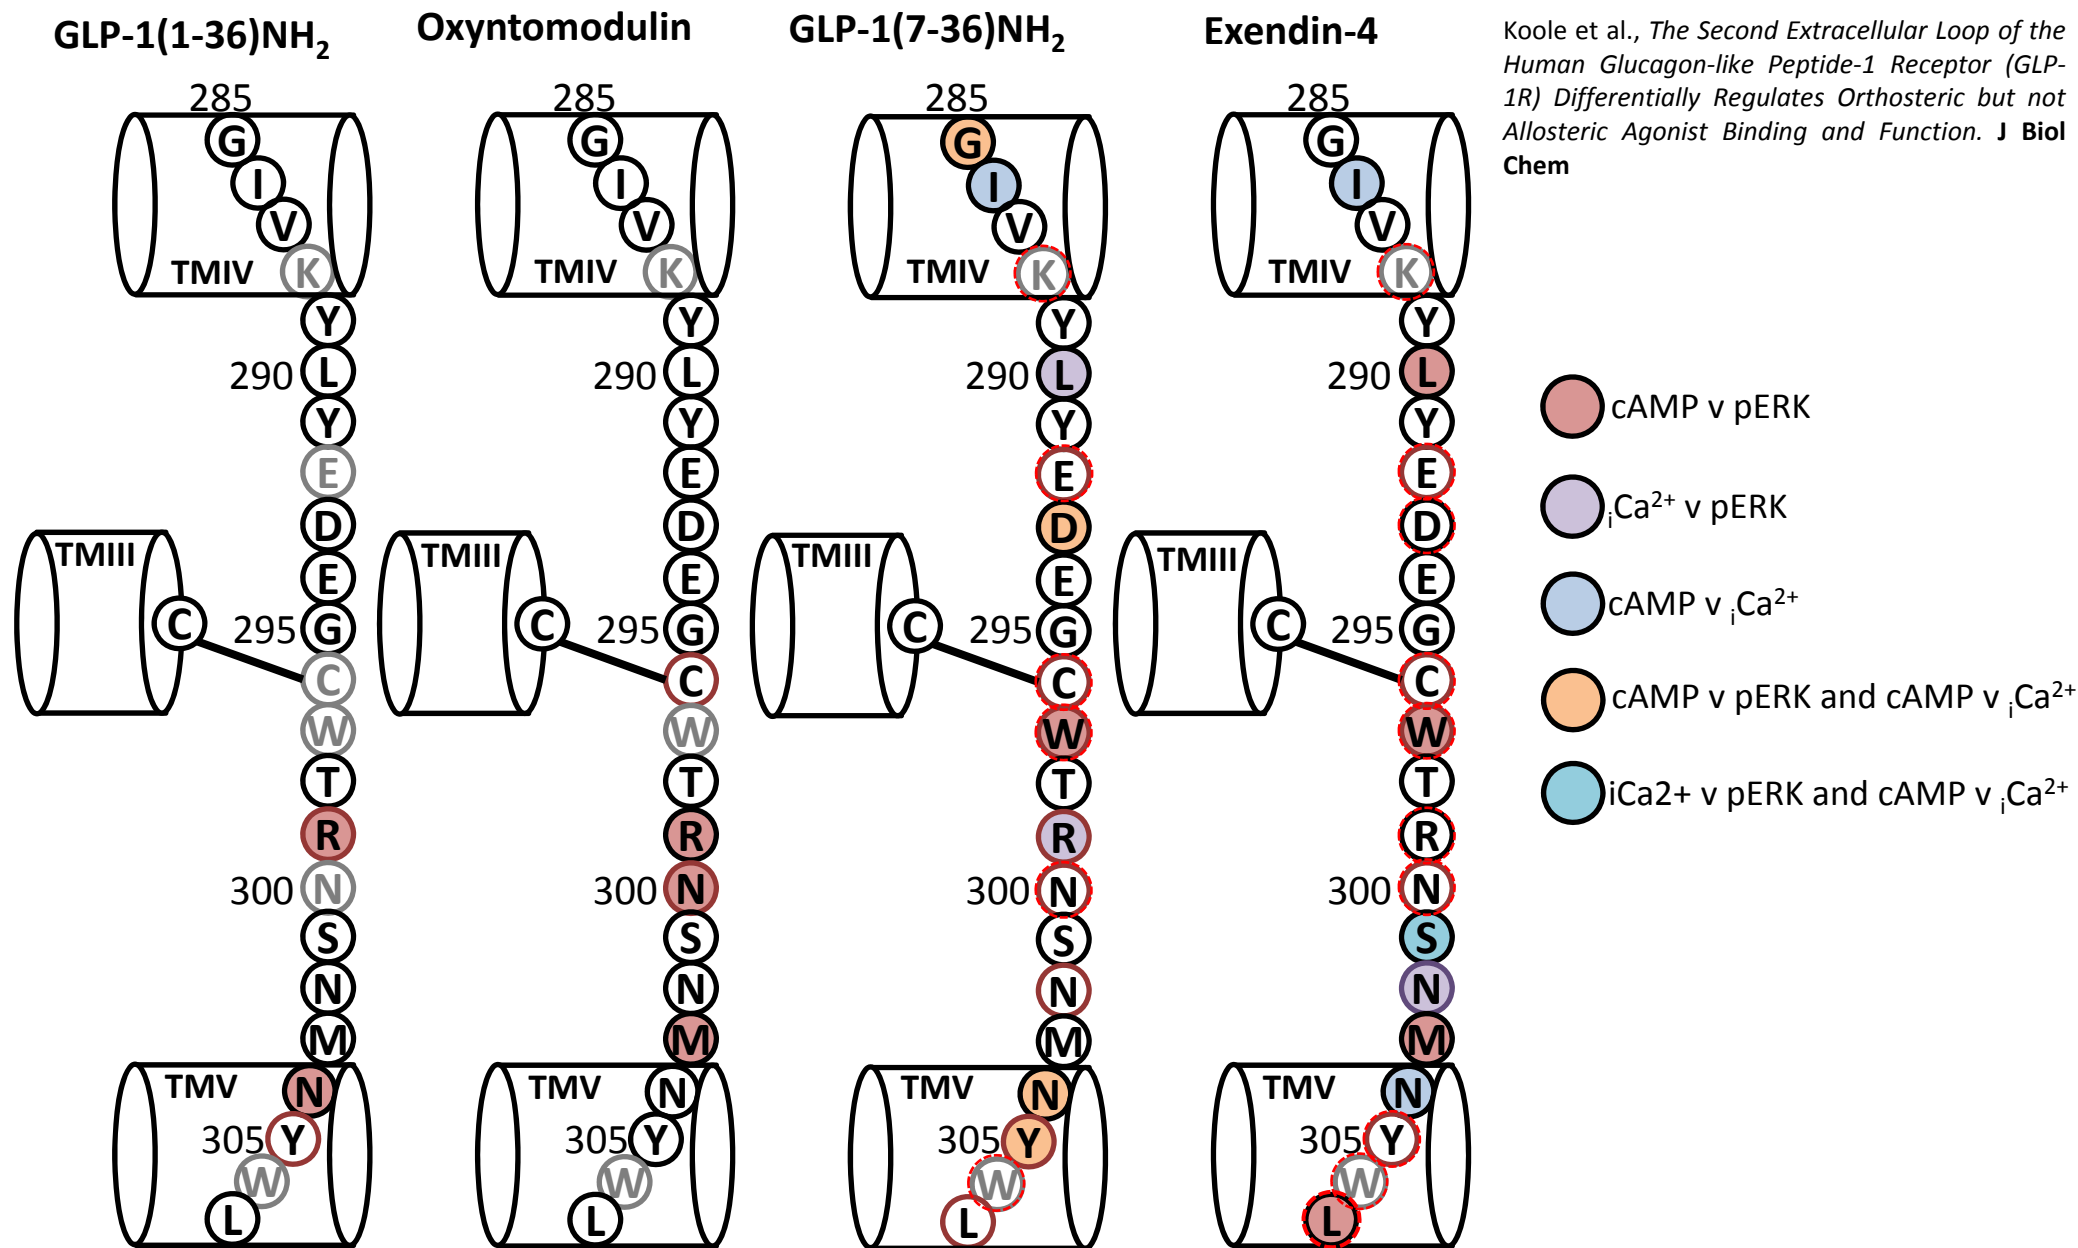

**Supplementary Figure S2. Schematic representation of ECL2 and adjacent amino acids identifying residues that selectively alter receptor signaling in response to peptide ligands.** Filled circles are those that demonstrated non-correlative behaviour in assessment of changes to delta Logtau<sub>c</sub> (from Figure 6 and Figure 7 from [18]). Those with coloured circle outlines display bias factors that were significantly different from wildtype receptor (Table 6 and Table 5 from [18]). No data are available for correlations with <sub>i</sub>Ca<sup>2+</sup> for the oxyntomodulin and GLP-1(1-36)NH<sub>2</sub> peptides due to lack of, or limited response in this assay. Grey circles and letters are those residues for which no cAMP response could be measured. Red-dashed over-circles identify residues for which no <sub>i</sub>Ca<sup>2+</sup> response could be measured for the exendin-4 or GLP-1(7-36)NH<sub>2</sub> peptides.

## SI Figure S3.

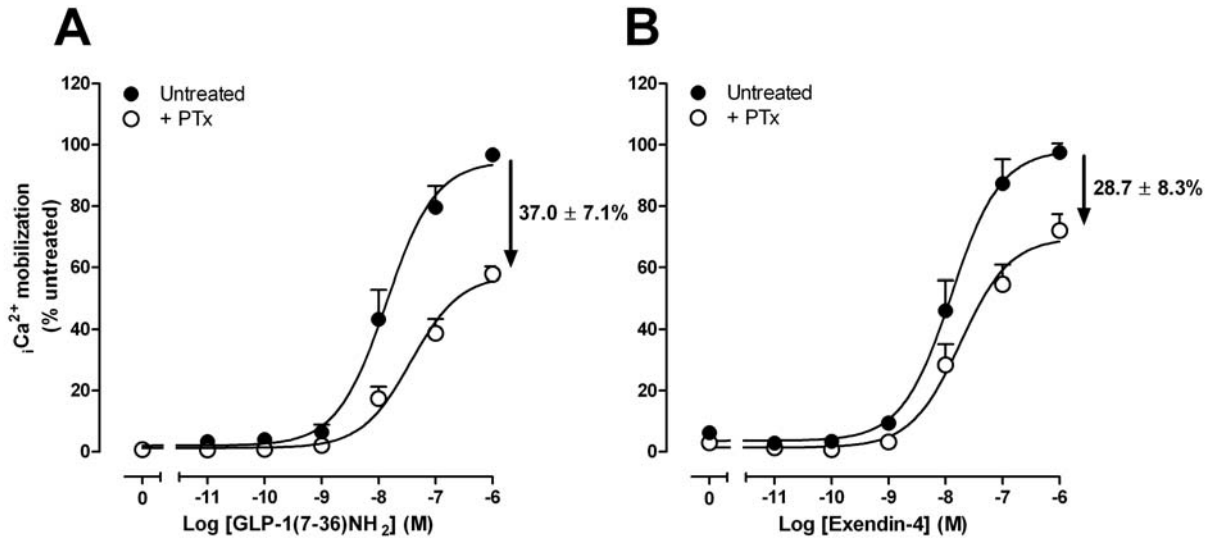

**Supplementary Figure S3. PTx inhibition of  $i\text{Ca}^{2+}$  mobilization at the wildtype human GLP-1R.** Characterization of PTx inhibition (A) GLP-1(7-36)NH<sub>2</sub>-mediated and (B) Exendin-4-mediated  $i\text{Ca}^{2+}$  mobilization in FlpInCHO cells stably expressing the wildtype human GLP-1R. Cells were pretreated with 100 ng ml<sup>-1</sup> PTx overnight in FBS-free DMEM prior to peptide addition and  $i\text{Ca}^{2+}$  mobilization detection. Data are normalized to the maximal response elicited by peptide alone and analyzed with a three-parameter logistic equation as defined in equation 1. All values are mean  $\pm$  S.E.M. of six to eight independent experiments, conducted in duplicate.
